# Supplementary material for: Venomics Reveals Venom Complexity of the Piscivorous Cone Snail, Conus tulipa
Source: MDPI journal article supplement (doi:10.3390/md17010071), 2019-01-21
Supplement: s1 [file s1]

## Supplementary Tables

**S3 Table. *C. tulipa* peptides reported in literature and their evidence from the proteome investigation.** Information has been provided from the LC-MS and LC-ESI-MS/MS analysis conducted on crude and enzyme digested duct segments. All except  $\mu$ -TIIIA and TVIIA were analysed from the venom duct proteome.

| Peptide name  | Literature mass (Da) | Experimental mass (Da) | MS/MS evidence | <sup>1</sup> Duct segment |
|---------------|----------------------|------------------------|----------------|---------------------------|
| $\rho$ -TIA   | 2389.14              | 2390.5351<br>2389.2206 | -              | DC<br>PC                  |
| $\mu$ -TIIIA  | 2455.97              | -                      | -              | -                         |
| TVIA          | 2844.05              | -                      | Yes            | PC                        |
| TVIIA         | 3209.276             | -                      | -              | -                         |
| Conantokin-T  | 2682.21              | 2682.3514              | Yes            | D                         |
| Conopressin-T | 1107.53              | 1107.5675              | Yes            | P and PC                  |
| T1.1          | 1904.68              | 1904.2497              | -              | P and PC                  |
| T1.2          | 1953.78              | 1953.2469              | Yes            | D                         |
| T6.1          | 3731.64              | -                      | Yes            | PC                        |

<sup>1</sup>Distal (D), Distal Central (DC), Proximal Central (PC) and Proximal (P).

**S4 Table. List of the major gene superfamilies expressed in the venom duct transcriptome of S1 and S2.** The total (T) number of precursors for each superfamily (SF) / specimen (S1/S2), the number of common (C) precursors and representative major precursor information for each superfamily has been detailed out. Additionally, novel precursor information from minor superfamilies has been provided.

| SF | T   | C   | Signal sequence | Mature sequence         | Framework                                 | Closest known precursor | <sup>1</sup> Known/Predicted pharmacology | Ref                                  |            |
|----|-----|-----|-----------------|-------------------------|-------------------------------------------|-------------------------|-------------------------------------------|--------------------------------------|------------|
|    | S1  | S2  |                 |                         |                                           |                         |                                           |                                      |            |
| B1 | 208 | 191 | 29              | MHLYTYLYLLVPLVTFHLILGTG | GEEEYQKMLENLKRKQES                        | N/A                     | Con-T                                     | *NMDA antagonist                     | [1]        |
| B2 | 24  | 11  | 2               | MLRLIIAAVLASACLAY       | GEELEERSHHSKFNGDSDNSPFQSEDGLENFMDFMKDNSNE | N/A                     | G066_VD                                   | n.d                                  | [2]        |
|    |     |     |                 |                         | NLPLQQR                                   |                         |                                           |                                      |            |
| O1 | 90  | 22  | 11              | MKLTCVVIVTVLLLLTAC      | CLSPGSSCSPTSYNCCRSCNPYSRKCR               | VI/VII                  | TVIA                                      | *ω /voltage-gated calcium channel    | [3]        |
|    |     |     |                 | MKLTCVVIVAVLLLLTAC      | QVSWWCGKPEATCGKLYLKCCSGRCNKANWKCL         | VI/VII                  | T6.1                                      | ω /voltage-gated calcium channel     | This study |
|    |     |     |                 | MKLTCVLIIAVLFLMAC       | SRSCSGRDSRCPPVCCMGLMCSRGKCVSIYGEK         | VI/VII                  | TVIIA                                     | Sodium channel                       | [4]        |
|    |     |     |                 | MKLTSALIVAVLFLTA        | NCFPNGKFCGFPKVGKPCCSGVCLFACT              | VI/VII                  | T6.2                                      | ω /voltage-gated calcium channel     | This study |
| O3 | 68  | 17  | 6               | MSGLGIMVLTLLLLVSMA      | SRPKTKECERYCELEEKHCCCIRSNGPKCSRICIFKFWC   | n.d                     | T6.3                                      | voltage-gated calcium/sodium channel | This study |
|    |     |     |                 | MSGLGIMVLTLLLLVLMTTSH   | CEMQCEQKKKHCCRVREERIQCAPKCWGIEW           | VI/VII                  | T6.4                                      | ω /Voltage-gated calcium channel     | This study |
| A  | 42  | 19  | 8               | MGMRMMFTVFLFVVLA        | FNWRCCLIPACRRNHKKFC                       | I                       | TIA                                       | *α <sub>1B</sub> -noradrenergic      | [5]        |



**S5 Table. List of the  $\rho$ -TIA precursor variants analysed from the S1 transcriptome.** The transcript number, signal sequence, mature peptide sequence and cysteine residue information has been detailed out. All the precursors display a tight conservation of the signal sequence region, whereas sequence variation is observed in the C-terminal sequence of mature peptide, with reference to the  $\rho$ -TIA peptide. Most TIA variants have retained the N-terminal sequence (FNWR) which comprises of the TIA pharmacophore interacting with the  $\alpha_{1B}$ -adrenoceptor.

| Transcript Number | Read frequency | Signal sequence         | Mature sequence                               | Cysteine Number |
|-------------------|----------------|-------------------------|-----------------------------------------------|-----------------|
| Tu052/TIA         | 2              | MGMRMMFTVFLEFV<br>VLATT | FNWRCCLIPACRRNHKKFC                           | 4               |
| Tu377             | 3              | MGMRMMFTAFLFV<br>VLATT  | FNWRCCLIPACRRNHKSFVADDADAHS<br>CHQNNQDMC      | 5               |
| Tu378             | 2              | MGMRMMFTVFLEFV<br>VLATT | KCCSIPKCYKNNKKMC                              | 4               |
| Tu379             | 2              | MGMRMMFTVFLEFV<br>VLATT | KCCSIPKCYKKQ                                  | 3               |
| Tu380             | 2              | MGMRMMFTVFLEFV<br>VLATT | KCCSIPKCYKNNKNKC                              | 4               |
| Tu381             | 2              | MGMRMMFTVFLEFV<br>VLATT | FNWRCCLIPAYRRNHKKFC                           | 3               |
| Tu395             | 3              | MGMRMMFTVFLEFV<br>VLATT | KCCSIPKCYKNNKKCVADDAGAHSCHQ<br>NNQDMC         | 6               |
| Tu393             | 2              | MGMRMMFTVFLEFV<br>VLATT | FNWRCCLIPACRRNQLKVC                           | 4               |
| Tu396             | 3              | MGMRMMFTVFLEFV<br>VLATT | FNWRCCLIPACRRNHKKFVADDADAHS<br>CHQNNQDMC      | 4               |
| Tu397             | 4              | MGMRMMFTVFLEFV<br>VLATT | FNWRCCLIPACRRNHKKFCDSYDADAH<br>SCHQNNQDMC     | 5               |
| Tu400             | 4              | MGMRMMFTVFLEFV<br>VLATT | FNWRCCLIPACRRNHKKFVADDADAHS<br>CHQNKTFCDSDRQE | 4               |
| Tu403             | 4              | MGMRMMFTVFLEFV<br>VLATT | FNWRCCLIPACRRNHKKFCGLTTLMLI<br>PVIRTIKTCVA    | 4               |

**S6 Table. Venom duct transcriptome expression of gene superfamilies in *C. tulipa* and *C. geographus*.** Transcriptomic data for both specimens retrieved from 454 pyrosequencing [2].  
✓denotes gene superfamily is present.

| Gene superfamily       | <i>C. tulipa</i><br>S1 | <i>C. tulipa</i><br>S2 | <i>C.</i><br><i>geographus</i> |
|------------------------|------------------------|------------------------|--------------------------------|
| A                      | ✓                      | ✓                      | ✓                              |
| B1(conantokins)        | ✓                      | ✓                      | ✓                              |
| B2                     | ✓                      | ✓                      | ✓                              |
| O1                     | ✓                      | ✓                      | ✓                              |
| O2                     |                        | ✓                      | ✓                              |
| O3                     | ✓                      | ✓                      | ✓                              |
| M                      | ✓                      | ✓                      | ✓                              |
| S                      | ✓                      | ✓                      | ✓                              |
| I1                     | ✓                      | ✓                      | ✓                              |
| I3                     |                        |                        | ✓                              |
| H                      | ✓                      | ✓                      |                                |
| J                      |                        |                        | ✓                              |
| T                      |                        | ✓                      | ✓                              |
| Con-ikot ikot          | ✓                      | ✓                      | ✓                              |
| conkunitzin            | ✓                      | ✓                      | ✓                              |
| Conopressin-conophysin | ✓                      | ✓                      | ✓                              |
| contryphan             |                        |                        | ✓                              |
| contulakin             |                        |                        | ✓                              |
| Newgeo 1               | ✓                      | ✓                      | ✓                              |
| Newgeo2                |                        |                        | ✓                              |
| Newgeo 3               | ✓                      | ✓                      | ✓                              |
| NewGeo 4               |                        |                        | ✓                              |

## References

1. Haack, J.A.; Rivier, J.; Parks, T.N.; Mena E.E.; Cruz, L.J.; Olivera, B.M. Conantokin-T. A gamma-carboxyglutamate containing peptide with N-methyl-d-aspartate antagonist activity. *J Biol Chem* **1990**, *265*, 6025-6029, doi:Retrieved from <https://www.ncbi.nlm.nih.gov/pubmed/2180939>.
2. Dutertre, S.; Jin, A.H.; Vetter, I.; Hamilton, B.; Sunagar, K.; Lavergne, V.; Dutertre, V.; Fry, B.G.; Antunes, A.; Venter, D.J., et al. Evolution of separate predation- and defence-evoked venoms in carnivorous cone snails. *Nature Comm* **2014**, *5*, 3521, doi:<https://doi.org/10.1038/ncomms4521>.
3. Chung, D.; Gaur, S.; Bell, J.R.; Ramachandran, J.; Nadasdi, L. Determination of disulfide bridge pattern in  $\omega$ -cono peptides. *Int J Pept Protein Res* **1995**, *46*, 320-325, doi:<https://doi.org/10.1111/j.1399-3011.1995.tb00604.x>
4. Hill, J.M.; Atkins, A.R.; Loughnan, M.L.; Jones, A.; Adams, D.A.; Martin, R.C.; Lewis, R.J.; Craik, D.J.; Alewood, P.F. Conotoxin TVIIA, a novel peptide from the venom of *Conus tulipa* 1. Isolation, characterization and chemical synthesis. *Eur J Biochem* **2000**, *267*, 4642-4648, doi:<https://doi.org/10.1046/j.1432-1327.2000.01508.x>.
5. Sharpe, I.A.; Gehrmann, J.; Loughnan, M.L.; Thomas, L.; Adams, D.A.; Atkins, A.; Palant, E.; Craik, D.J.; Adams, D.J.; Alewood, P.F. Two new classes of conopeptides inhibit the  $\alpha$ 1-adrenoceptor and noradrenaline transporter. *Nature Neurosci* **2001**, *4*, 902-907, doi:<https://doi.org/10.1038/nn0901-902>.

6. Hu, H.; Bandyopadhyay, P.K.; Olivera, B.M.; Yandell, M. Elucidation of the molecular envenomation strategy of the cone snail *Conus geographus* through transcriptome sequencing of its venom duct. *BMC Genomics* **2012**, *13*, 284, doi: <https://doi.org/10.1186/1471-2164-13-284>
7. Dutertre, S.; Croker, D.; Daly, N.L.; Andersson, A.; Muttenthaler, M.; Lumsden, N.G.; Craik, D.J.; Alewood, P.F.; Guillon, G.; Lewis, R.J. Conopressin-T from *Conus tulipa* reveals an antagonist switch in vasopressin-like peptides. *J Biol Chem* **2008**, *283*, 7100-7108, doi:<https://doi.org/10.1074/jbc.M706477200>.
8. Lewis, R.J.; Schroeder, C.I.; Ekberg, J.; Nielsen, K.J.; Loughnan, M.; Thomas, L.; Adams, D.A.; Drinkwater, R.; Adams, D.J.; Alewood, P.F. Isolation and structure-activity of  $\mu$ -conotoxin TIIIA, a potent inhibitor of tetrodotoxin-sensitive voltage-gated sodium channels. *Mol Pharmacol* **2007**, *71*, 676-685, doi:<https://doi.org/10.1124/mol.106.028225>.
